# Supplementary material for: SeqTagger, a rapid and accurate tool to demultiplex direct RNA nanopore sequencing datasets
Source: bioRxiv preprint, doi:10.1101/2024.10.29.620808, version 1 (2024-10-30)
Supplement: Supplemental_Table_S3 [file 620808_file09.xlsx]

## Sheet: Table S3 Model performance mRNA
Table S3 - Model performance across RNA chemistries and devices
	Precision -- TP/(TP+FP)				Recall -- TP/(TP+FN)				Accuracy -- (TP+TN)/(TP+TN+FP+FN)				Recovery -- (TP+FP)/(TP+FP+TN+FN)
	RNA002			RNA004	RNA002			RNA004	RNA002			RNA004	RNA002			RNA004
	rep1	rep2	rep3	rep1	rep1	rep2	rep3	rep1	rep1	rep2	rep3	rep1	rep1	rep2	rep3	rep1
SeqTagger	0.990041	0.990313	0.990355	0.994675	0.948454	0.94943	0.949586	0.96824	0.93949	0.940693	0.940885	0.963246	0.948941	0.949895	0.950048	0.609631
DeePlexicon_s0.9	0.967267	0.9693	0.969847	N/A	0.730144	0.743433	0.747951	N/A	0.712538	0.72633	0.730953	N/A	0.736651	0.749335	0.753679	N/A
DeePlexicon_s0.5	0.924182	0.928169	0.930353	N/A	0.880244	0.886636	0.888896	N/A	0.82096	0.829705	0.833436	N/A	0.88831	0.893916	0.895828	N/A
